# Supplementary material for: A Novel Pyroptosis-Based Prognostic Model Correlated with the Parainflammatory Immune Microenvironment of Pancreatic Cancer
Source: Hindawi journal article supplement (doi:10.1155/2023/8776892), 2023-12-21
Supplement: f1 [file 8776892.f1.docx]

**Table S1** 57 pyroptosis-related genes and 47 immune checkpoint genes.

| **Pyroptosis-related genes** | **Immune checkpoint genes** |
| --- | --- |
| AIM2 | IDO1 |
| APIP | ADORA2A |
| BAK1 | BTLA |
| BAX | BTNL2 |
| CASP1 | C10orf54 |
| CASP3 | CD160 |
| CASP4 | CD200 |
| CASP5 | CD200R1 |
| CASP6 | CD244 |
| CASP8 | CD27 |
| CASP9 | CD274 |
| CHMP2A | CD276 |
| CHMP2B | CD28 |
| CHMP3 | CD40 |
| CHMP4A | CD40LG |
| CHMP4B | CD44 |
| CHMP4C | CD48 |
| CHMP6 | CD70 |
| CHMP7 | CD80 |
| CYCS | CD86 |
| DHX9 | CTLA4 |
| ELANE | HAVCR2 |
| GPX4 | HHLA2 |
| GSDMA | ICOS |
| GSDMB | ICOSLG |
| GSDMC | IDO2 |
| GSDMD | KIR3DL1 |
| GSDME | LAG3 |
| GZMA | LAIR1 |
| GZMB | LGALS9 |
| HMGB1 | NRP1 |
| IL18 | PDCD1 |
| IL1A | PDCD1LG2 |
| IL1B | TIGIT |
| IL6 | TMIGD2 |
| IRF1 | TNFRSF14 |
| IRF2 | TNFRSF18 |
| NAIP | TNFRSF25 |
| NLRC4 | TNFRSF4 |
| NLRP1 | TNFRSF8 |
| NLRP2 | TNFRSF9 |
| NLRP3 | TNFSF14 |
| NLRP6 | TNFSF15 |
| NLRP7 | TNFSF18 |
| NLRP9 | TNFSF4 |
| NOD1 | TNFSF9 |
| NOD2 | VTCN1 |
| PJVK |  |
| PLCG1 |  |
| PRKACA |  |
| PYCARD |  |
| SCAF11 |  |
| TIRAP |  |
| TNF |  |
| TP53 |  |
| TP63 |  |
| ZBP1 |  |
