# Supplementary material for: A Novel Pyroptosis-Based Prognostic Model Correlated with the Parainflammatory Immune Microenvironment of Pancreatic Cancer
Source: Hindawi journal article supplement (doi:10.1155/2023/8776892), 2023-12-21
Supplement: f3 [file 8776892.f3.pdf]

GSDMC, Ixazomib citrate

Cor=-0.576, p<0.001

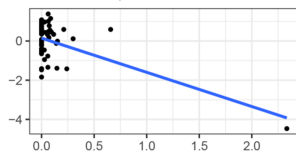

(a)

IL18, Pipamperone

Cor=-0.509, p<0.001

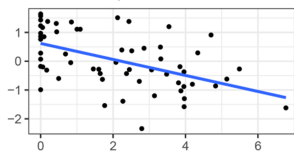

(b)

IL18, Bortezomib

Cor=-0.509, p<0.001

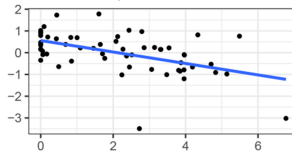

(c)

GSDMC, Midostaurin

Cor=-0.492, p<0.001

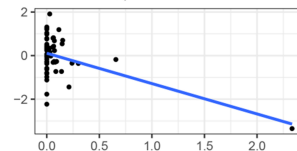

(d)

GSDMC, Bortezomib

Cor=-0.464, p<0.001

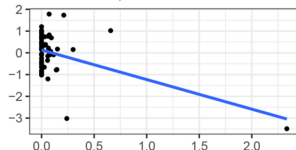

(e)

IL18, Actinomycin D

Cor=-0.449, p<0.001

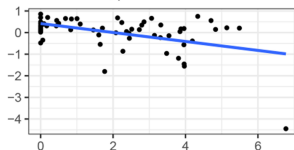

(f)

IL18, Estramustine

Cor=-0.441, p<0.001

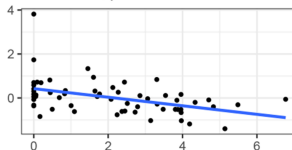

(g)

IL18, Vemurafenib

Cor=-0.439, p<0.001

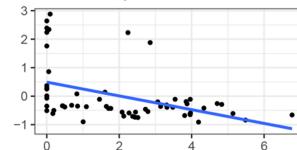

(h)

GSDMC, pralatrexate

Cor=-0.436, p<0.001

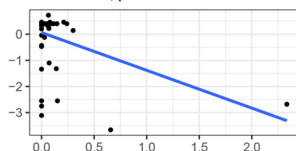

(i)

IL18, Vinblastine

Cor=-0.402, p=0.001

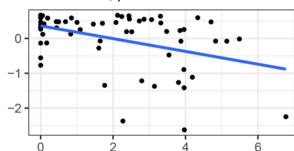

(j)

IL18, Raloxifene

Cor=-0.396, p=0.002

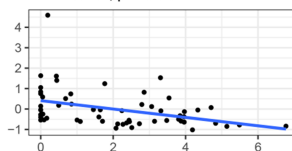

(k)

IL18, Arsenic trioxide

Cor=-0.395, p=0.002

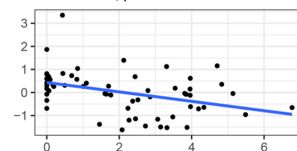

(l)

IL18, Lomustine

Cor=-0.389, p=0.002

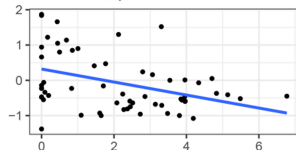

(m)

IL18, Carfilzomib

Cor=-0.388, p=0.002

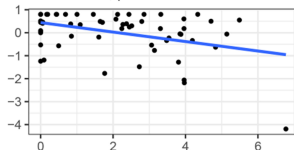

(n)

IL18, Carmustine

Cor=-0.382, p=0.003

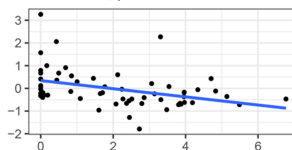

(o)

IL18, Depsipeptide

Cor=-0.380, p=0.003

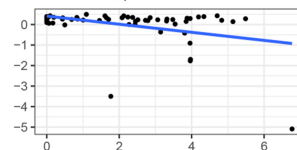

(p)
