# Supplementary figures and images for: A Novel Pyroptosis-Based Prognostic Model Correlated with the Parainflammatory Immune Microenvironment of Pancreatic Cancer
Source: Hindawi journal article supplement (doi:10.1155/2023/8776892), 2023-12-21

**BAK1****GSDMC****IL18****Normal**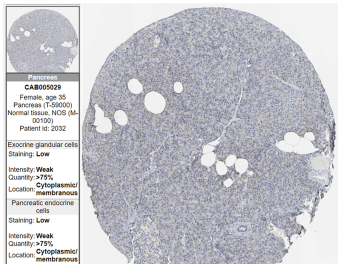**(a)**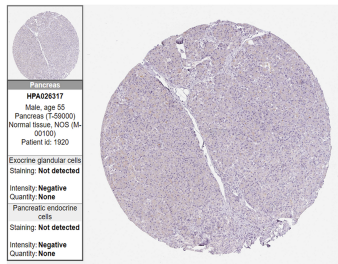**(b)**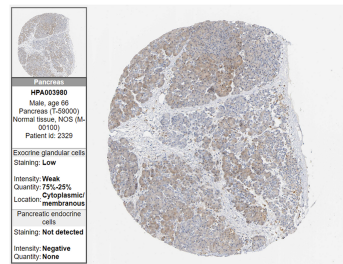**(c)****Tumor**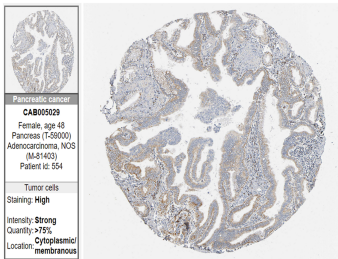**(d)**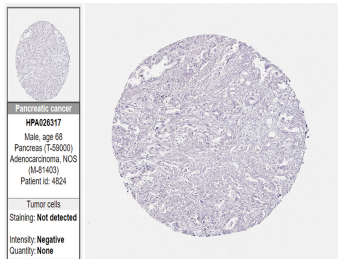**(e)**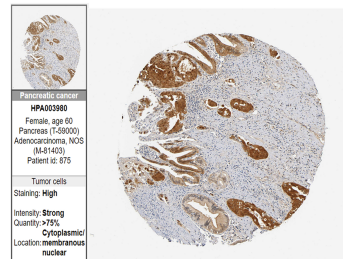**(f)**

Supplement: f2 [file 8776892.f2.pdf]
